# Supplementary material for: Microsporidial Infection and Associated Risk Factors Among Pediatric Renal Patients
Source: Research Square preprint supplement (doi:10.21203/rs.3.rs-7789598/v1), 2025-11-05
Supplement: Supplementary file 1 [file 59d4cf07e27bdba849c5db9b.pdf]

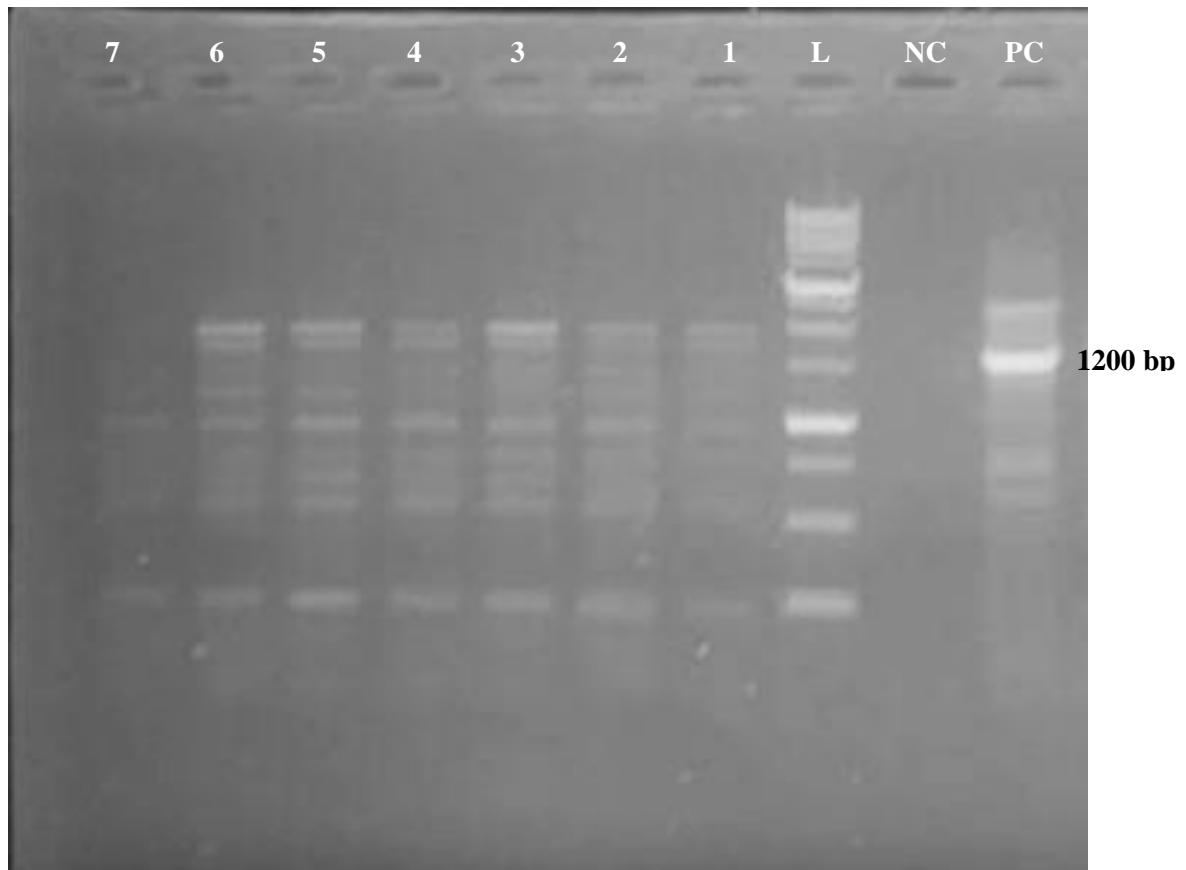

**Figure (2): Analysis of PCR products of human blood samples by 1.5% agarose gel electrophoresis.** A 1200 bp DNA fragment of the microsporidia DNA gene was amplified using primers C1 and C2. Lane L (DNA marker ladder). Lane NC negative control, PC positive control. Lane 1, 2, 3, 4, 5, 6, and 7 negatives for microsporidia.

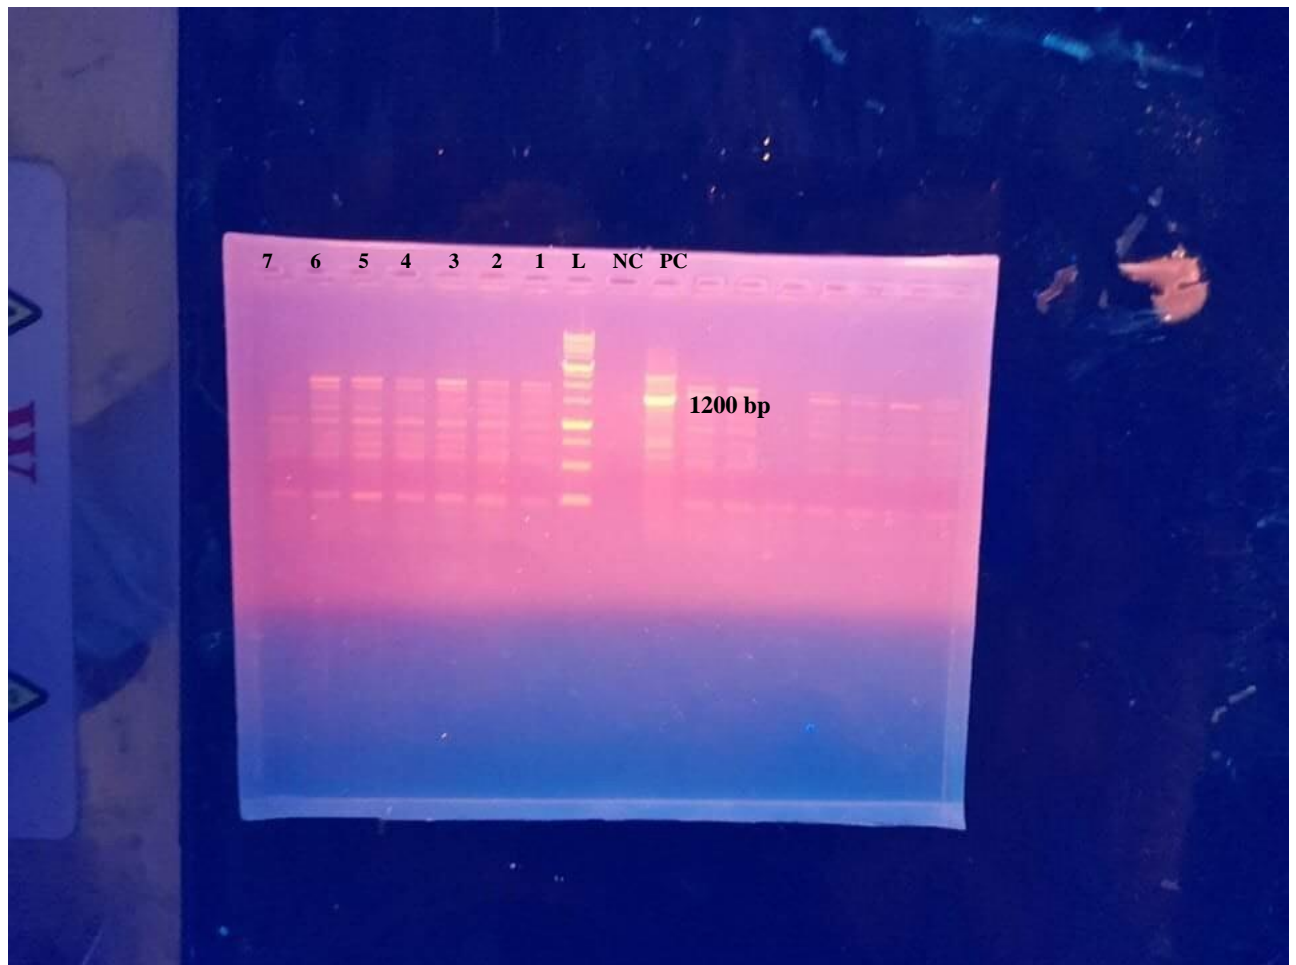

**Figure (2): Analysis of PCR products of human blood samples by 1.5% agarose gel electrophoresis.** A 1200 bp DNA fragment of the microsporidia DNA gene was amplified using primers C1 and C2. Lane L (DNA marker ladder). Lane NC negative control, PC positive control. Lane 1, 2, 3, 4, 5, 6, and 7 negatives for microsporidia.

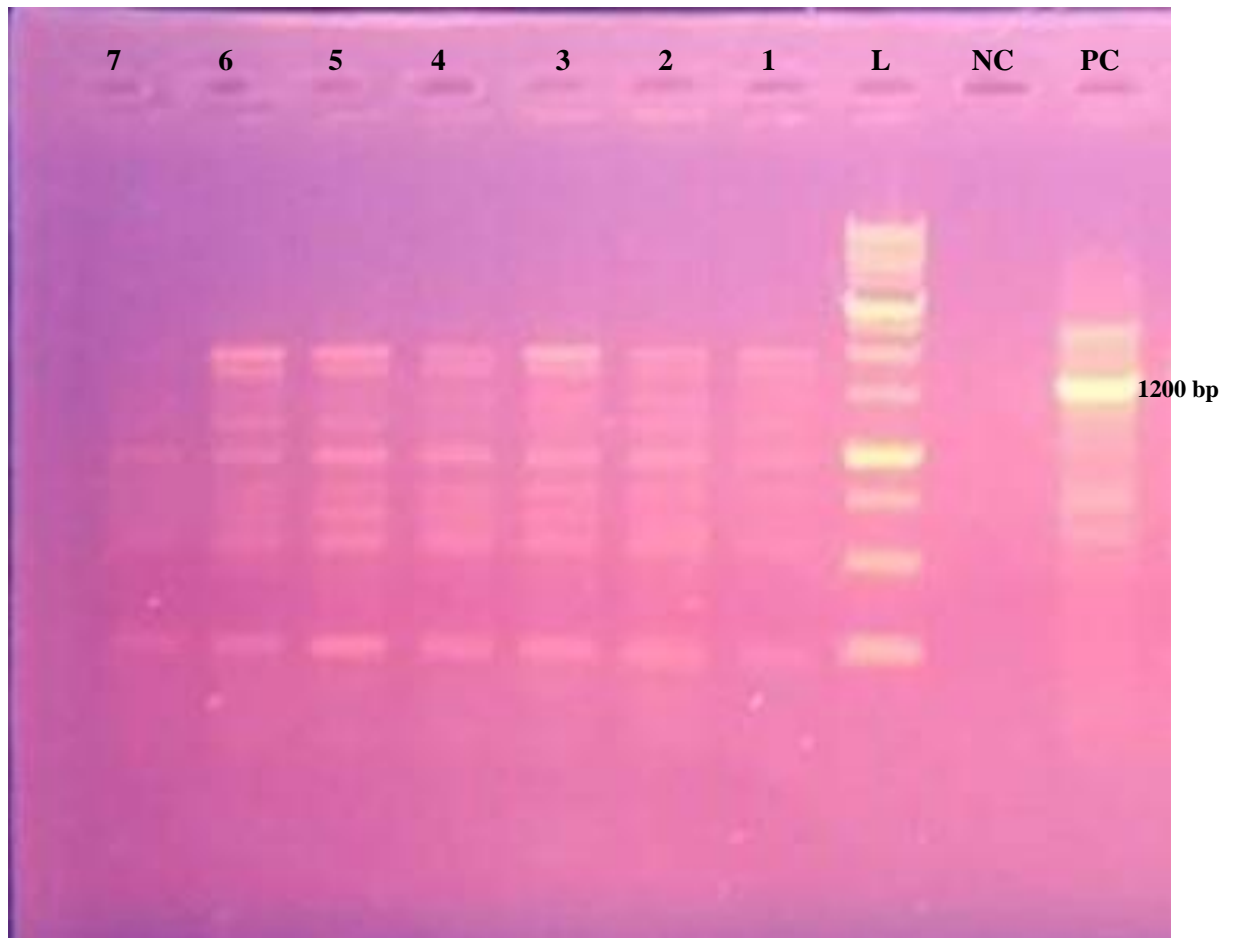

**Figure (2): Analysis of PCR products of human blood samples by 1.5% agarose gel electrophoresis.** A 1200 bp DNA fragment of the microsporidia DNA gene was amplified using primers C1 and C2. Lane L (DNA marker ladder). Lane NC negative control, PC positive control. Lane 1, 2, 3, 4, 5, 6, and 7 negatives for microsporidia.

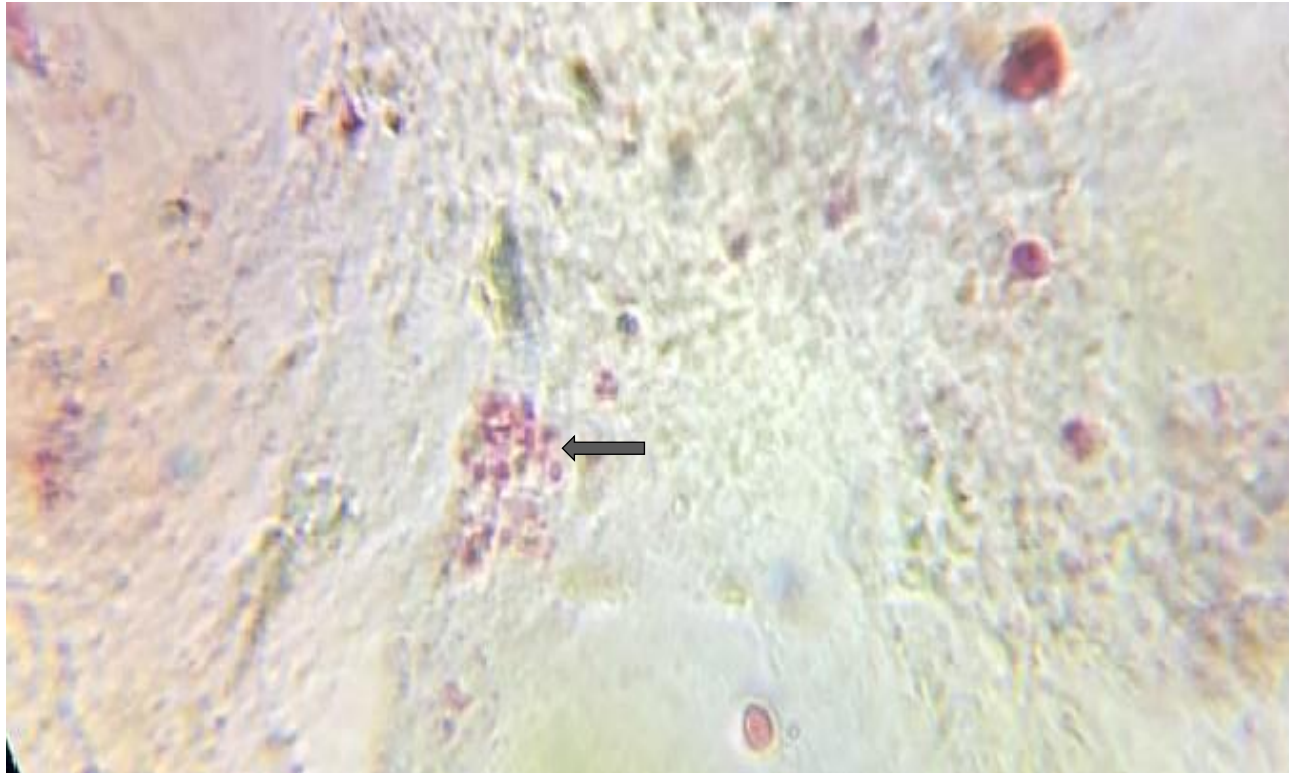

**Figure 1. Spores of microsporidia in a stool smear stained with MTS, viewed under a light microscope using the oil immersion lens (1000×).**
